# Supplementary material
Source: PubMed Central journal article supplement (PMC3075583)
Supplement: NIHMS257175-supplement-Supp_Figure_S2.pdf [file NIHMS257175-supplement-Supp_Figure_S2.pdf]

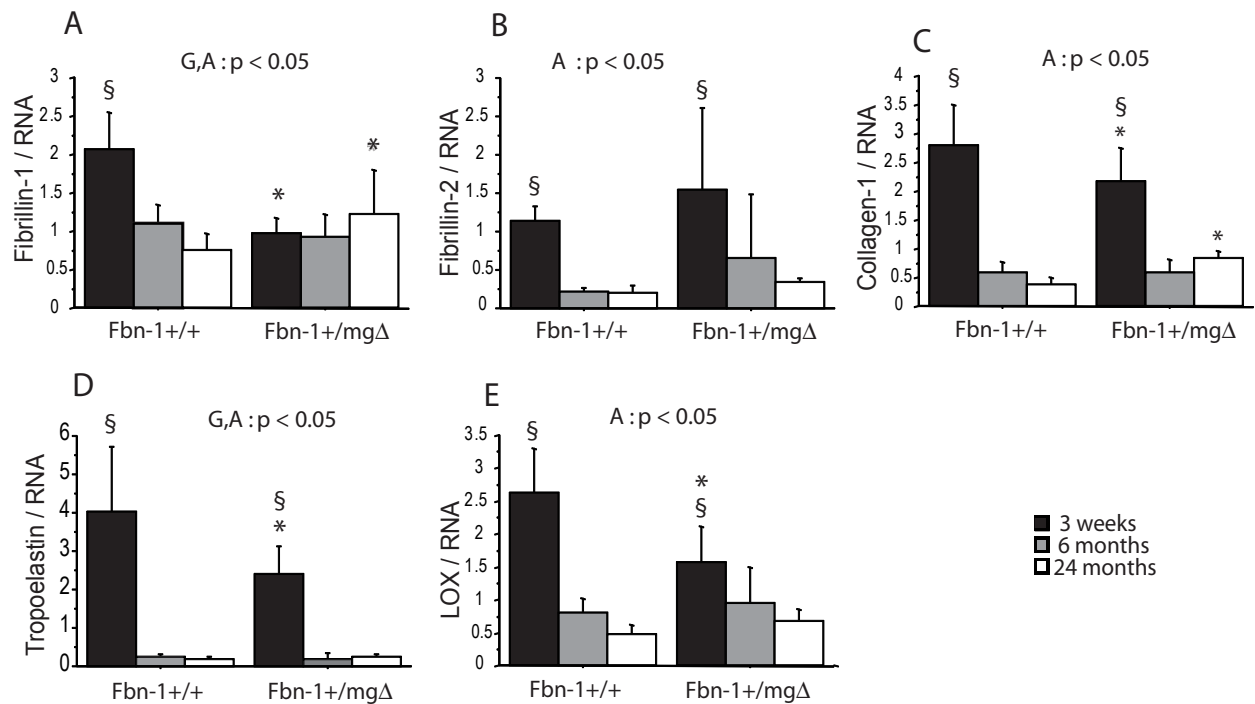

### Legend:

Elastic fiber-related gene expression normalized against total mRNA of the ascending aorta of 3 weeks, 6 and 24-month-old Fbn1+/+ and Fbn1+/mgD mice. The general effect of genotype (G) and age (A) was assessed by two-way ANOVA separately in each condition (A to E), and followed by Fisher's LSD test for paired comparisons.

\*Significant difference between Fbn1+/+ and Fbn1+/mgD mice of the same age, and between 6- and 24-months-old age of the same genotype, respectively.

§Significant difference between young (3-week-old) on one hand and 6- and 24-monthold animals of the same genotype on the other hand.
